1 ***Original research article***

2

3 **Efficacy and Safety of Edoxaban in Anticoagulant Therapy Early after Surgical**

4 **Bioprosthetic Valve Replacement: the ENBALV trial**

5

6 Chisato Izumi, MD, PhD<sup>1</sup>, Masashi Amano, MD, PhD<sup>1</sup>, Satsuki Fukushima, MD, PhD<sup>2</sup>, Hitoshi Yaku,  
7 MD, PhD<sup>3</sup>, Kiyoyuki Eishi<sup>4</sup>, MD, PhD, Taichi Sakaguchi, MD, PhD<sup>5</sup>, Nobuhisa Ohno, MD, PhD<sup>6</sup>, Arudo  
8 Hiraoka, MD, PhD<sup>7</sup>, Kenji Okada, MD, PhD<sup>8</sup>, Yoshikatsu Saiki, MD, PhD<sup>9</sup>, Takashi Miura, MD, PhD<sup>10</sup>,  
9 Tatsuhiko Komiya, MD, PhD<sup>11</sup>, Manabu Minami, MD, PhD<sup>12</sup>, Haruko Yamamoto, MD, PhD<sup>12</sup>, Katsuhiko

10 Omae, PhD<sup>12</sup>, for the ENBALV Trial investigators\*

11

12 <sup>1</sup> Department of Heart Failure and Transplant, National Cerebral and Cardiovascular Center, Suita, Japan

13 <sup>2</sup> Department of Cardiovascular Surgery, National Cerebral and Cardiovascular Center, Suita, Japan

14 <sup>3</sup> Department of Cardiovascular Surgery, Kyoto Prefectural University of Medicine, Kyoto, Japan

15 <sup>4</sup> Department of Cardiovascular Surgery, Hakujuji Hospital, Fukuoka, Japan

16 <sup>5</sup> Department of Cardiovascular Surgery, Hyogo Medical University, Nishinomiya, Japan

17 <sup>6</sup> Department of Cardiovascular Surgery, Kokura Memorial Hospital

18 <sup>7</sup> Department of Cardiovascular Surgery, Sakakibara Heart Institute of Okayama

19 <sup>8</sup> Department of Cardiovascular Surgery, Kobe University Graduate School of Medicine

20 <sup>9</sup> Department of Cardiovascular Surgery, Tohoku University Graduate School of Medicine

21 <sup>10</sup> Department of Cardiovascular Surgery, Nagasaki University Graduate School of Biomedical Sciences

22 <sup>11</sup> Department of Cardiac Surgery, Kurashiki Central Hospital

NOTE: This preprint reports new research that has not been certified by peer review and should not be used to guide clinical practice.

23 <sup>12</sup> Department of Data Science, National Cerebral and Cardiovascular Center, Suita, Japan

24

25

26 \* A full list of the investigators in the ENBALV trial is provided in the Supplemental  
27 material.

28

29 Running title; edoxaban early after bioprosthetic valve surgery

30

31 Address for correspondence: Chisato Izumi, MD, PhD

32 ORCHiD: <https://orcid.org/0000-0002-3282-1327>

33 Director, Department of Heart Failure and Transplantation, National Cerebral and  
34 Cardiovascular Center, 6-1 Kishibe Shimmachi, Suita, Osaka 564-8565 Japan.

35 Tel: +81-661701070

36 Fax: +81-661701069

37 E-mail: [izumi-ch@nccvc.go.jp](mailto:izumi-ch@nccvc.go.jp)

38

39 Total word count: 3104 (5651 including title page, abstract, text, references, tables, and figure  
40 legends)

41

42

43 **Abstract**

44

45 **Background**

46 Anticoagulant therapy with vitamin K antagonists is recommended in the current guidelines  
47 for 3 to 6 months following bioprosthetic valve replacement to prevent thromboembolic  
48 events, including in patients with sinus rhythm. However, in the era of direct oral  
49 anticoagulants (DOACs), there is a paucity of evidence regarding the efficacy and safety of  
50 DOACs in this patient group.

51 **Methods**

52 The ENBALV trial was an investigator-initiated, phase 3, randomized, open-label,  
53 multicenter study that aimed to evaluate the efficacy and safety of edoxaban compared to  
54 warfarin within 3 months following bioprosthetic valve replacement at the aortic and/or  
55 mitral position. The primary outcome was stroke or systemic embolism. The secondary  
56 outcomes included major bleeding, intracardiac thrombus, and a composite of stroke,  
57 systemic embolism, or major bleeding.

58 **Results**

59 Of 410 enrolled patients, 389 were included in the final analysis (73±6 years, 56.8% male,  
60 79.4% sinus rhythm, edoxaban group: n=195, warfarin group: n=194). The primary outcome  
61 occurred in 0.5% (n=1) in the edoxaban group, whereas in 1.5% (n=3) in the warfarin group

62 (risk difference, -1.03, 95% confidence interval [CI], -4.34 to 1.95). Major bleeding  
63 occurred in 4.1% (n=8) in the edoxaban group and in 1.0% (n=2) in the warfarin (risk  
64 difference, 3.07; 95% CI, -0.67 to 7.27). The incidence of major bleeding was numerically  
65 higher in the edoxaban group, but no fatal bleeding or intracranial hemorrhage was observed  
66 in patients treated with edoxaban, whereas one fatal intracranial hemorrhage occurred in the  
67 warfarin group. Intracardiac thrombus did not occur in any of the patients in the edoxaban  
68 group, but did occur in 1.0% (n=2) in the warfarin group.

## 69 **Conclusions**

70 Edoxaban had comparable efficacy to warfarin for the prevention of thromboembolic events  
71 in patients early after bioprosthetic valve replacement, suggesting that it is a potential  
72 alternative anticoagulant therapy.

73

## 74 **Trial registration**

75 The study was registered with the Japan Registry of Clinical Trials (JRCT), with reference  
76 number 2051210209 (30 March 2022; <https://jrct.niph.go.jp/latest-detail/jRCT2051210209>).

77

## 78 **Key words**

79 Anticoagulant, Bioprosthetic valve, Cardiac surgery, Embolism, Hemorrhage

80

81 **Clinical perspective**

82

83 **What is new?**

84 ● Current guidelines recommend the administration of warfarin for patients early after  
85 bioprosthetic valve replacement, including those with sinus rhythm, but there is a paucity  
86 of evidence regarding the efficacy and safety of direct oral anticoagulants (DOACs) in  
87 this patient group.

88 ● ENBALV trial provides the first large-scale evidence on the use of DOAC in patients  
89 early after bioprosthetic valve surgery.

90 ● ENBALV trial demonstrated that edoxaban had comparable efficacy to warfarin for  
91 preventing thromboembolism. No fatal or intracranial hemorrhage was observed with  
92 edoxaban. Our results suggest that edoxaban could be an alternative to warfarin in this  
93 patient group.

94

95 **What are the clinical implications?**

96 ● The availability of edoxaban could offer more flexibility in anticoagulant treatment  
97 options after bioprosthetic valve surgery. Since edoxaban does not require regular and  
98 frequent blood testing, it could simplify the care process, reduce the burden on patients,  
99 and improve their quality of life, especially in the crucial early period after surgery.

- 100 ● The availability of edoxaban also give benefits for medical stuffs as well as patients,  
101 because edoxaban can be used with constant dose, no need of routine monitoring of  
102 anticoagulation activity, and a low risk of interaction with other drugs and food.  
103

104 **Introduction**

105

106 The number of patients with valvular heart disease has been increasing and this trend has  
107 been paralleled by an increase in the prevalence of bioprosthetic valve replacement with  
108 aging society.<sup>1</sup> The incidence of embolic events has been reported to be high early after  
109 bioprosthetic valve replacement;<sup>2-6</sup> therefore, anticoagulant therapy with vitamin K  
110 antagonists is recommended in the current guidelines for 3 to 6 months following  
111 bioprosthetic valve replacement to prevent thromboembolic events, including in patients with  
112 sinus rhythm.<sup>7-9</sup>

113 Randomized clinical trials have demonstrated the efficacy and safety of direct oral  
114 anticoagulants (DOACs) versus warfarin for the treatment of patients with nonvalvular atrial  
115 fibrillation (AF),<sup>10-12</sup> and DOACs have become widely used, because the routine monitoring  
116 of anticoagulation activity is not required and there is a low risk of interaction with other  
117 drugs and food.

118 Evidence supporting the use of DOACs in patients with AF who have undergone  
119 bioprosthetic valve replacement has been provided by several subgroup analyses of  
120 randomized clinical trials<sup>13-15</sup> and observational studies<sup>16-18</sup>. In addition, a randomized  
121 clinical trial that compared the use of rivaroxaban and warfarin in patients with AF and a  
122 bioprosthetic mitral valve<sup>19</sup> revealed the non-inferiority of rivaroxaban to warfarin with

123 respect to a composite outcome of death, major cardiovascular events, or major bleeding.  
124 However, fewer than 20% (n=189) of the participants had undergone bioprosthetic valve  
125 replacement within the preceding 3 months, and there were no participants with sinus rhythm.  
126 In addition, another study demonstrated the efficacy and safety of edoxaban versus warfarin  
127 in patients who underwent mitral valve repair or bioprosthetic valve replacement, but the  
128 bioprosthetic valve replacement group was small (n=152).<sup>20</sup>

129 The efficacy and safety of EdoxabaN in anticoagulant therapy after surgical  
130 Bioprosthetic vALVe replacement (ENBALV) trial was a randomized clinical trial that aimed  
131 to evaluate the efficacy and safety of edoxaban compared to warfarin early after bioprosthetic  
132 valve replacement.

133

## 134 **Methods**

135

### 136 ***Trial design and oversight***

137 The trial design has been described previously.<sup>21</sup> Briefly, the ENBALV trial was an  
138 investigator-initiated, phase 3, randomized, open-label, multicenter study. We evaluated the  
139 efficacy and safety of the use of edoxaban compared to warfarin within 3 months following  
140 bioprosthetic valve replacement. Details of the participating investigators and trial  
141 organization are provided in the Supplementary material.



142 All the procedures involving human participants were performed in accordance with the  
143 1964 Declaration of Helsinki and its later amendments or comparable ethical standards, and  
144 with the Japanese Pharmaceutical Affairs Act and related laws and regulations. The study  
145 protocol was approved by the National Cerebral and Cardiovascular Center Review Board in  
146 addition to the Institutional Review Board of each participating institution and it was  
147 registered with the Japan Registry of Clinical Trials (jRCT 2051210209). Written informed  
148 consent was obtained from all the patients before they were recruited.

149 An independent safety monitoring committee monitored all the safety data and was  
150 involved in decisions regarding trial continuation or protocol changes. All suspected  
151 outcomes and the results of imaging evaluations were adjudicated by an independent event  
152 committee, the members of which were unaware of the trial group assignments.

153

#### 154 ***Trial population***

155 We studied patients aged 18 to 85 years who underwent bioprosthetic valve replacement at  
156 the aortic and/or mitral position. Patients with both sinus rhythm and AF were included. The  
157 main exclusion criteria were a contraindication to the use of either warfarin or edoxaban, an  
158 extremely high risk of hemorrhage, and the presence of a mechanical valve or greater than  
159 moderate mitral stenosis, except if replacement of the mechanical valve or stenotic mitral  
160 valve by a bioprosthetic valve was performed at this operation. Further details regarding the

161 inclusion and exclusion criteria of the ENBALV trial are shown in Table S1. To minimize the  
162 risk of withdrawal because of worsening renal function after surgery, the patient selection  
163 criterion for renal function was set as a creatinine clearance of  $\geq 30$  mL/min, not  $\geq 15$  mL/min.

164

### 165 *Trial procedures*

166 Eligible patients were randomly allocated to either the edoxaban or warfarin group at a 1:1  
167 ratio using a web-based randomization system and the minimization method. The adjustment  
168 factors were 1) the valve position (aortic valve alone, mitral valve alone, or both valves), 2)  
169 the presence of AF, and 3) the administration of antiplatelet drugs.

170 Bioprosthetic valve replacement was performed within 8 weeks of randomization.  
171 Edoxaban or warfarin administration was started following bioprosthetic valve replacement,  
172 as soon as the surgeons had determined that it was appropriate for anticoagulant therapy to  
173 commence. Anticoagulant therapy initiation could be delayed according to patients' condition  
174 such as postoperative wound bleeding. The present study was performed during the unstable  
175 period immediately following open heart surgery; therefore, the surgeons could use their  
176 discretion to determine when anticoagulant therapy should be initiated, to prioritize patient  
177 safety.

178 Edoxaban was orally administered at the dose of 60 mg once daily, or 30 mg once daily  
179 when the patient's creatinine clearance was 30 to 50 mL/min (calculated using the

180 Cockcroft–Gault equation), their body weight was  $\leq 60$  kg, or they were being concomitantly  
181 treated with a P-glycoprotein inhibitor. The dose of warfarin was adjusted under monitoring  
182 the prothrombin time-international normalized ratio (PT-INR). Administration of edoxaban  
183 or warfarin was continued for 12 weeks after surgery if the patient did not meet any of the  
184 criteria for its discontinuation, and their administration could be continued until 24 weeks at  
185 the surgeons' discretion. Clinical evaluations were conducted from the initiation of study  
186 drug administration to the end of study treatment.

187 The patients underwent clinical assessment and laboratory testing 1 and 7 days after the  
188 administration of edoxaban or warfarin commenced and at discharge. After discharge, they  
189 were scheduled to visit an outpatient clinic 4, 8, and 12 weeks after initiation of anticoagulant  
190 therapy. Clinical assessments, including the evaluation of symptoms suggestive of clinical  
191 thromboembolic or hemorrhagic events and laboratory testing, were performed at the  
192 outpatient visits.

193 The patients underwent a 12-lead electrocardiography and transthoracic  
194 echocardiography as part of eligibility assessment prior to randomization, at discharge, and  
195 12 weeks after initiation of anticoagulant therapy. Brain magnetic resonance imaging (MRI)  
196 or computed tomography (CT) was also performed during the eligibility assessment process  
197 prior to randomization and 12 weeks after initiation of anticoagulant therapy.

198

199 ***Primary and secondary outcomes***

200       The primary outcome was a composite of stroke or systemic embolism. The key  
201 secondary outcomes were major bleeding, intracardiac thrombus, and a composite of stroke,  
202 systemic embolism, or major bleeding, according to the definition of the International Society  
203 on Thrombosis and Haemostasis. The secondary outcomes also included the individual  
204 components of the composite outcome and other clinical events. A complete list of trial  
205 endpoints is provided in Table S2.

206

207 ***Statistical analysis***

208 The event rates for the primary endpoints in the study and control treatment groups were  
209 estimated to be 1% to 3%, based on historical reports.<sup>2-5</sup> Thus, the difference in the event rate  
210 between the control and study treatment groups was not expected to be very large.  
211 Furthermore, the number of patients that could be included within a reasonable study period  
212 was estimated to be approximately 450, and it was judged not to be reasonable to conduct a  
213 non-inferiority trial on this scale to test the hypothesis. Therefore, to determine whether the  
214 study drug was not significantly inferior to the control drug, we decided to evaluate whether  
215 the difference in the point estimates of the event rate for the primary endpoint was below a  
216 certain threshold. A previous study<sup>2</sup> that included data from a no-treatment group estimated  
217 that the event rate within 3 months after surgery in the absence of treatment was >7%. On

218 this basis, the experts in our study group determined that 2% is a clinically acceptable and  
219 reasonable threshold for the difference in event rate between the treatment and control groups.  
220 Given the 450 enrolled patients, 1:1 allocation, and a dropout rate of approximately 10%, the  
221 primary endpoint was expected to be assessed in 202 patients in each group. The event rates  $p$   
222 and  $q$  for the treatment and control groups were assumed to follow a uniform distribution  
223 within the interval [0.01, 0.03], and the occurrence of events in the treatment and control  
224 groups were assumed to follow a Bernoulli distribution with occurrence probabilities  $p$  and  $q$ ,  
225 respectively. Under these conditions, the probability that the point estimate of  $p-q$  is  $<2\%$   
226 was evaluated by a simulation study and estimated to be approximately 90%. On the basis of  
227 the above considerations, the target number of patients to be enrolled in the trial was set as  
228 450.

229 The primary analysis of the trial data was performed in a full analysis set (FAS) based  
230 on intention-to-treat principles. The FAS consisted of all the assigned study participants,  
231 excluding those who did not meet the primary enrollment criteria, those who never received  
232 any study treatments, those for whom post-assignment data were not available, and those who  
233 withdrew consent for the use of their data. The point estimate of the event rate for the primary  
234 endpoint was calculated for each of the study and control treatment groups to determine  
235 whether the difference in event rates was  $\leq 2\%$ . As an additional analysis, a similar evaluation  
236 was conducted on the per-protocol set, a population of the FAS that excludes subjects who

237 were found to have violations or deviations from the study protocol that would affect the  
238 evaluation of the primary endpoint. Other endpoints were summarized and compared by  
239 groups, with subpopulation analyses conducted as necessary. All analyses were performed  
240 using SAS software, version 9.4 (SAS Institute Inc., Cary, NC, USA).

241

## 242 **Results**

243

### 244 *Patient backgrounds and follow-up*

245 Between May 6, 2022, and January 25, 2024, a total of 430 patients gave their consent to  
246 participate and were assessed for eligibility at 24 institutions. Of these, 410 patients  
247 underwent randomization (205 were assigned to receive edoxaban and 205 were assigned to  
248 receive warfarin). Of these 410 patients, 21 did not receive edoxaban or warfarin; therefore,  
249 389 patients were included in the final analysis (edoxaban group, n=195; warfarin group,  
250 n=194) (Figure 1).

251 The clinical characteristics of the patients are shown in Table 1. The two groups were  
252 well balanced with respect to their baseline characteristics. The mean age was 73 years,  
253 including 42 (10.8%) patients of  $\geq 80$  years of age, and 56.8% were male. The CHADS<sub>2</sub> score,  
254 CHA<sub>2</sub>DS<sub>2</sub>-VASc score, and HAS-BLED score were  $2.0 \pm 1.2$ ,  $3.4 \pm 1.4$ , and  $1.1 \pm 0.6$ ,  
255 respectively. Positions of bioprosthetic valve were aortic valve only in 339 (87.1%) patients,

256 mitral valve only in 37 (9.5%) patients, and both in 13 (3.3%) patients. Of the 389 patients,  
257 67 (17.2%) were taking antiplatelet drugs and 80 (20.6%) had atrial fibrillation, namely, the  
258 majority of patients had sinus rhythm.

259 The date of the last patient follow-up was April 25, 2024. The median duration of  
260 participation in the trial was 98 days (interquartile range, 92 to 106 days). Of the 389 patients,  
261 20 in the edoxaban group (11 discontinued edoxaban because of adverse events, and nine  
262 were judged as lack of capability to continue participation in the trial) and 17 in the warfarin  
263 group (six discontinued warfarin because of adverse events, two withdrew their consent, eight  
264 were judged as lack of capability to continue participation in the trial, and one died) did not  
265 complete the trial.

266 The patients in the warfarin group had PT-INR values within the therapeutic range  
267 (2.0–3.0 seconds) for a median of 19.0% (interquartile range, 7.0%–31.4%) of the study  
268 period.

269

### 270 ***Primary and secondary outcomes***

271 The primary outcome occurred in one patient (0.5%) in the edoxaban group, whereas in  
272 three patients (1.5%) in the warfarin group (risk difference,  $-1.03$ ; 95% confidence interval  
273 [CI],  $-4.34$  to  $1.95$ ) (Figures 2 and 3A). Systemic embolism did not occur in any of the study  
274 patients; thus all of the events of primary outcome were stroke. Intracardiac thrombus did not

275 occur in any of the patients in the edoxaban group, but did occur in two patients (1.0%) in the  
276 warfarin group (risk difference,  $-1.03$ ; 95% CI,  $-4.07$  to  $1.52$ ) (Figures 2 and 3B).

277 Major bleeding occurred in eight patients (4.1%) in the edoxaban group and in two  
278 patients (1.0%) in the warfarin group (risk difference,  $3.07$ ; 95% CI,  $-0.67$  to  $7.27$ ) (Figures 2  
279 and 3C). The sites of the major bleeding in each group are shown in Table S3. No fatal  
280 bleeding or intracranial hemorrhage was observed in patients treated with edoxaban despite  
281 high incidence of gastrointestinal bleeding. In the warfarin group, one patient died of cerebral  
282 hemorrhage. Clinically relevant hemorrhage occurred in 11 patients (5.6%) taking edoxaban  
283 and five (2.6%) taking warfarin (risk difference,  $3.06$ ; 95% CI,  $-1.46$  to  $7.84$ ).

284 The net outcome (the composite of stroke, systemic embolism, or major bleeding)  
285 occurred in nine patients (4.6%) in the edoxaban group and in four patients (2.1%) in the  
286 warfarin group (risk difference,  $2.55$ ; 95% CI,  $-1.64$  to  $7.02$ ) (Figures 2 and 3D).

287 The incidences of the other secondary outcomes were also similar for the two groups  
288 (Figure 2).

289

### 290 ***Results of the subgroup analysis***

291 The incidences of the primary endpoint in the two groups were generally consistent across all  
292 the prespecified subgroups (Figure 4). With respect to major bleeding and the net outcome,  
293 the results were also generally consistent across all the prespecified subgroups (Figures S1



294 and S2).

295

## 296 **Discussion**

297

298 The present study provides the first large-scale evidence on the use of DOAC in patients  
299 early after bioprosthetic valve surgery. Notably, approximately 80% of the study patients had  
300 sinus rhythm.

301 The incidence of embolic events has been reported to be high early after bioprosthetic  
302 valve replacement.<sup>2-6, 22</sup> This high incidence of thromboembolic events may be caused by  
303 thrombus formation associated with the lack of endothelialization of prosthetic valves,<sup>23</sup> the  
304 high prevalence of perioperative AF, and cardiac dysfunction early after bioprosthetic valve  
305 surgery. Therefore, current guidelines<sup>7-9</sup> recommend anticoagulant therapy with vitamin K  
306 antagonists for 3 to 6 months following bioprosthetic valve replacement.

307 Warfarin has a narrow therapeutic range. Therefore, we need to adjust the dose of  
308 warfarin by blood monitoring of anticoagulation activity, and it takes a few days to enter the  
309 therapeutic range. In contrast, we can use constant dose of edoxaban determined by body  
310 weight, renal function and concurrent drugs, with no need of routine monitoring of  
311 anticoagulation activity. The effects of edoxaban emerge within 3 hours after administration,  
312 and edoxaban as well as other DOACs have a low risk of interaction with other drugs and

313 food. The prevalence of DOAC administration has been increasing, and DOACs are  
314 prescribed in approximately 70% of patients with newly diagnosed AF, because of the  
315 aforementioned properties of DOAC.<sup>24-26</sup> These properties are beneficial for patients early  
316 after cardiac surgery, when their condition is unstable. According to the results of a database  
317 analysis performed in the United States in 2020, the administration of DOACs at the time of  
318 discharge following bioprosthetic valve replacement had been increasing since 2011 in  
319 real-world clinical practice, despite this being off-label use in patients with sinus rhythm.<sup>27</sup>

320 Several studies have shown the efficacy and safety of DOACs in patients with a history  
321 of bioprosthetic valve replacement and AF.<sup>13-19</sup> However, in the era of DOACs, there is a  
322 paucity of evidence regarding the efficacy and safety of DOACs in patients early after  
323 bioprosthetic valve replacement including patients with sinus rhythm.<sup>20</sup>

324 The results of the ENBALV trial demonstrate that edoxaban is comparable to warfarin  
325 with respect to the primary endpoint of stroke or systemic embolism in patients early after  
326 bioprosthetic valve replacement. The results of this clinical study met the primary endpoint,  
327 which was agreed by the Japanese Regulatory Pharmaceuticals and Medica Devices Agency.  
328 In addition, intracardiac thrombus did not occur in any of the patients taking edoxaban, but  
329 did occur in two patients taking warfarin. Thus, in patients early after bioprosthetic valve  
330 replacement, who are at a high risk of thromboembolic events, edoxaban showed efficacy  
331 compared to warfarin for the prevention of thromboembolic event and intracardiac thrombus

332 formation.

333 The incidence of major bleeding events was numerically higher in the edoxaban group  
334 (4.1% vs 1.0%; risk difference, 3.07; 95% CI, -0.67 to 7.27). However, fatal bleeding or  
335 intracranial hemorrhage did not occur despite high incidence of gastrointestinal bleeding. On  
336 the other hand, one patient died of cerebral hemorrhage in the warfarin group. In addition, the  
337 incidence of major bleeding in the edoxaban group in the present study was similar to that  
338 identified in previous studies<sup>2, 3, 5, 20, 28, 29</sup> evaluating clinical events early after bioprosthetic  
339 valve replacement.

340 The time in therapeutic range in the warfarin group was very short (19.0%) in the  
341 present study. During the unstable period immediately following open heart surgery, there is  
342 a significant risk of hemorrhage; therefore, surgeons tend to underdose patients, such that  
343 their PT-INRs are shorter than would be ideal. In addition, it is difficult to achieve  
344 appropriate therapeutic range of warfarin during the relatively short period of hospitalization.  
345 The short time in therapeutic range may influence on the occurrence rate of embolic events  
346 and bleeding. However, this undertreatment with warfarin reflects the current clinical  
347 situation and is precisely the problem associated with warfarin administration. Increase in  
348 treatment option of anticoagulant therapy early after cardiac surgery may have clinical  
349 advantages, because the conditions of the patients are highly variable during this period. It  
350 may give benefits for medical stuffs as well as patients, because edoxaban can be used with

351 constant dose, no need of routine monitoring of anticoagulation activity, and a low risk of  
352 interaction with other drugs and food.

353 The present study had several limitations. First, the open-label protocol could have  
354 introduced bias. Warfarin should be administered with monitoring of dose adjustments using  
355 the PT-INR, whereas the dose of edoxaban is constant, determined by renal function and  
356 body weight, not the PT-INR. Therefore, we were unable to blind the participants or their  
357 physicians with regard to the treatment group. However, outcome assessments were  
358 conducted by assessors who were blinded to the treatment allocation. In addition, data  
359 management and monitoring were performed by independent clinical research entities to  
360 minimize the risk of bias. Second, the timing of the initiation of anticoagulant therapy was  
361 determined by the surgeons, which may have influenced the incidences of the clinical events.  
362 However, the present study was of patients in an unstable condition immediately after  
363 open-heart surgery, and therefore the study protocol was designed to prioritize patient safety.  
364 Third, we did not include patients undergoing transcatheter aortic valve replacement.  
365 However, the strategy of antithrombotic therapy after bioprosthetic valve replacement differs  
366 for patients who undergo surgical or transcatheter aortic valve replacement, according to the  
367 current guidelines.<sup>7-9</sup> Therefore, the study population was limited to patients undergoing  
368 surgical bioprosthetic valve replacement.

369 In conclusion, edoxaban demonstrated comparable efficacy to warfarin for the

370 prevention of thromboembolic events in patients early after undergoing bioprosthetic valve

371 replacement, suggesting that it is a potential alternative anticoagulant therapy.

372

373

374 **Acknowledgments**

375 We thank all the investigators (listed in the Supplemental Materials) and the study nurses  
376 /study coordinators involved in the ENBALV trial, and the staff members of DOT WORLD  
377 Co., Ltd for their assistance in the management of data collection, storage, and analysis.

378 We also thank Mark Cleasby, PhD from Edanz (<https://jp.edanz.com/ac>) for editing a draft of  
379 this manuscript.

380

381 **Sources of funding**

382 This investigator-initiated trial was funded by Daiichi Sankyo Co., Ltd.

383

384 **Disclosures**

385 Dr Izumi has received speaker honoraria from Daiichi Sankyo Co., Ltd., Nippon Boehringer  
386 Ingelheim, and Novartis and research funding from Pfizer, LSI Medience Co., PPD-SNBL  
387 K.K., Abbott Medical Japan, Bristol-Myers Squibb, and Eli Lilly and Company.

388 Dr. Sakaguchi has received speaker honoraria from Abbott Medical Japan and Medtronic  
389 Japan.

390 The other authors have no relevant financial or non-financial interests to disclose.

391

392

393

394 **Supplemental material**

395 List of investigators

396 Trial committee members

397 Tables S1–S3

398 Figures S1–S2

399

400

401 **References**

402

403 1. Head SJ, Çelik M, Kappetein AP. Mechanical versus bioprosthetic aortic valve  
404 replacement. *Eur Heart J*. 2017;38:2183–2191. doi: 10.1093/eurheartj/ehx141

405 2. Mérie C, Køber L, Olsen PS, Andersson C, Gislason G, Jensen JS, Torp-Pedersen C.  
406 Association of warfarin therapy duration after bioprosthetic aortic valve replacement  
407 with risk of mortality, thromboembolic complications, and bleeding. *JAMA*.  
408 2012;308:2118–2125. doi: 10.1001/jama.2012.54506

409 3. Brennan JM, Edwards FH, Zhao Y, O'Brien S, Booth ME, Dokholyan RS, Douglas  
410 PS, Peterson ED; DEcIDE AVR Research Team. Early anticoagulation of bioprosthetic  
411 aortic valves in older patients: results from the Society of Thoracic Surgeons Adult  
412 Cardiac Surgery National Database. *J Am Coll Cardiol*. 2012;60:971–977. doi:  
413 10.1016/j.jacc.2012.05.029

414 4. Heras M, Chesebro JH, Fuster V, Penny WJ, Grill DE, Bailey KR, Danielson GK,  
415 Orszulak TA, Pluth JR, Puga FJ, et al. High risk of thromboemboli early after  
416 bioprosthetic cardiac valve replacement. *J Am Coll Cardiol*. 1995;25:1111–1119. doi:  
417 10.1016/0735-1097(94)00563-6

418 5. Zhang H, Dong Y, Ao X, Fu B, Dong L; CLIATHVR (Chinese Low Intensity  
419 Anticoagulant Therapy After Heart Valve Replacement) multicenter clinical study team.



- 420 Comparison of antithrombotic strategies in Chinese patients in sinus rhythm after  
421 bioprosthetic mitral valve replacement: early outcomes from a multicenter registry in  
422 China. *Cardiovasc Drugs Ther.* 2021;35:1–10. doi: 10.1007/s10557-020-07069-8
- 423 6. Russo A, Grigioni F, Avierinos JF, Freeman WK, Suri R, Michelena H, Brown R,  
424 Sundt T, Enriquez-Sarano M. Thromboembolic complications after surgical correction of  
425 mitral regurgitation incidence, predictors, and clinical implications. *J Am Coll Cardiol.*  
426 2008;51:1203–1211. doi: 10.1016/j.jacc.2007.10.058
- 427 7. Izumi C, Eishi K, Ashihara K, Arita T, Otsuji Y, Kunihara T, Komiya T, Shibata T,  
428 Seo Y, Daimon M, et al. JCS/JSCS/JATS/JSVS 2020 Guidelines on the management of  
429 valvular heart disease. *Circ J.* 2020;84:2037–2119. doi: 10.1253/circj.CJ-20-0135
- 430 8. Otto CM, Nishimura RA, Bonow RO, Carabello BA, Erwin 3<sup>rd</sup> JP, Gentile F, Jneid  
431 H, Krieger EV, Mack M, McLeod C, et al. 2020 ACC/AHA Guideline for the  
432 management of patients with valvular heart disease: executive summary: a report of the  
433 American College of Cardiology/American Heart Association Joint Committee on  
434 Clinical Practice Guidelines. *Circulation.* 2021;143:e35–e71. doi:  
435 10.1161/CIR.0000000000000932
- 436 9. Vahanian A, Beyersdorf F, Praz F, Milojevic M, Baldus S, Bauersachs J, Capodanno  
437 D, Conradi L, De Bonis M, De Paulis R, et al. 2021 ESC/EACTS Guidelines for the  
438 management of valvular heart disease. *Eur Heart J.* 2022;43:561–632. doi:

439 10.1093/eurheartj/ehab395

440 10. Giugliano RP, Ruff CT, Braunwald E, Murphy SA, Wiviott SD, Halperin JL, Waldo  
441 AL, Ezekowitz MD, Weitz JI, Špinar J, et al. Edoxaban versus warfarin in patients with  
442 atrial fibrillation. *N Engl J Med*. 2013;369:2093–2104. doi: 10.1056/NEJMoa1310907

443 11. Granger CB, Alexander JH, McMurray JJV, Lopes RD, Hylek EM, Hanna M,  
444 Al-Khalidi HR, Ansell J, Atar D, Avezum A, et al. Apixaban versus warfarin in patients  
445 with atrial fibrillation. *N Engl J Med*. 2011;365:981–992. doi: 10.1056/NEJMoa1107039

446 12. Patel MR, Mahaffey KW, Garg J, Pan G, Singer DE, Hacke W, Breithardt G,  
447 Halperin JL, Hankey GJ, Piccini JP, et al. Rivaroxaban versus warfarin in nonvalvular  
448 atrial fibrillation. *N Engl J Med*. 2011;365:883–891. doi: 10.1056/NEJMoa1009638

449 13. Avezum A, Lopes RD, Schulte PJ, Lanus F, Gersh BJ, Hanna M, Pais P, Erol C,  
450 Diaz R, Bahit MC, et al. Apixaban in comparison with warfarin in patients with atrial  
451 fibrillation and valvular heart disease: findings from the Apixaban for Reduction in  
452 Stroke and Other Thromboembolic Events in Atrial Fibrillation (ARISTOTLE) trial.  
453 *Circulation*. 2015;132:624–632. doi: 10.1161/CIRCULATIONAHA.114.014807

454 14. Carnicelli AP, De Caterina R, Halperin JL, Renda G, Ruff CT, Trevisan M, Nordio F,  
455 Mercuri MF, Antman E, Giugliano RP, et al. Edoxaban for the prevention of  
456 thromboembolism in patients with atrial fibrillation and bioprosthetic valves. *Circulation*.  
457 2017;135:1273–1275. doi: 10.1161/CIRCULATIONAHA.116.026714

- 458 15. Guimarães PO, Pokorney SD, Lopes RD, Wojdyla DM, Gersh BJ, Giczewska A,  
459 Carnicelli A, Lewis BS, Hanna M, Wallentin L, et al. Efficacy and safety of apixaban vs  
460 warfarin in patients with atrial fibrillation and prior bioprosthetic valve replacement or  
461 valve repair: insights from the ARISTOTLE trial. *Clin Cardiol.* 2019;42:568–571. doi:  
462 10.1002/clc.23178
- 463 16. Guimaraes HP, Lopes RD, de Barros e Silva PGM, Liporace IL, Sampaio RO,  
464 Tarasoutchi F, Hoffmann-Filho CR, Patriota RdeLS, Leiria TLL, Lamprea D, et al.  
465 Rivaroxaban in patients with atrial fibrillation and a bioprosthetic mitral valve. *N Engl J*  
466 *Med.* 2020;383:2117–2126. doi: 10.1056/NEJMoa2029603
- 467 17. Izumi C, Miyake M, Fujita T, Koyama T, Tanaka H, Ando K, Komiya T, Izumo M,  
468 Kawai H, Eishi K, et al. Antithrombotic therapy for patients with atrial fibrillation and  
469 bioprosthetic valves – real-world data from the multicenter, prospective, observational  
470 BPV-AF Registry. *Circ J.* 2022;86:440–448. doi: 10.1253/circj.CJ-21-0564
- 471 18. Suppah M, Kamal A, Saadoun R, Baradeiya AMA, Abraham B, Alsidawi S, Sorajja  
472 D, Fortuin FD, Arsanjani R. An evidence-based approach to anticoagulation therapy  
473 comparing direct oral anticoagulants and vitamin K antagonists in patients with atrial  
474 fibrillation and bioprosthetic valves: a systematic review, meta-analysis, and network  
475 meta-analysis. *Am J Cardiol.* 2023;206:132–150. doi: 10.1016/j.amjcard.2023.07.141
- 476 19. Pasciolla S, Zizza LF, Le T, Wright K. Comparison of the efficacy and safety of

- 477 direct oral anticoagulants and warfarin after bioprosthetic valve replacements. *Clin Drug*  
478 *Investig.* 2020;40:839–845. doi: 10.1007/s40261-020-00939-x
- 479 20. Shim CY, Seo J, Kim YJ, Lee SH, De Caterina R, Lee S, Hong G-R. Efficacy and  
480 safety of edoxaban in patients early after surgical bioprosthetic valve implantation or  
481 valve repair: a randomized clinical trial. *J Thorac Cardiovasc Surg.* 2023;165:58–67.  
482 doi: 10.1016/j.jtcvs.2021.01.127
- 483 21. Izumi C, Amano M, Fukushima S, Yaku H, Eishi K, Sakaguchi T, Minami M,  
484 Yamamoto H, Onda K, Omae K. Efficacy and safety of edoxaban in anticoagulant  
485 therapy early after surgical bioprosthetic valve replacement: rationale and design of the  
486 ENBALV trial. *Cardiovasc Drugs Ther.* 2024 Jun 24. doi:  
487 10.1007/s10557-024-07585-x. Online ahead of print.
- 488 22. Chang WT, Ho CH, Chang CL, Cheng BC, Wu NC, Chen ZC. Influence of warfarin  
489 on cardiac and cerebrovascular events following bioprosthetic aortic valve replacement:  
490 a nationwide cohort study. *J Thorac Cardiovasc Surg.* 2020;159:1730–1739. doi:  
491 10.1016/j.jtcvs.2019.04.096
- 492 23. Makkar RR, Fontana G, Jilaihawi H, Chakravarty T, Kofoed KF, De Backer O, Asch  
493 FM, Ruiz CE, Olsen NT, Trento A, et al. Possible subclinical leaflet thrombosis in  
494 bioprosthetic aortic valves. *N Engl J Med.* 2015;373:2015–2024. doi:  
495 10.1056/NEJMoa1509233

- 496 24. Gadsbøll K, Staerk L, Fosbøl EL, Sindet-Pedersen C, Gundlund A, Lip GYH,  
497 Gislason GH, Olesen JB. Increased use of oral anticoagulants in patients with atrial  
498 fibrillation: temporal trends from 2005 to 2015 in Denmark. *Eur Heart J.* 2017;38:899–  
499 906. doi: 10.1093/eurheartj/ehw658
- 500 25. Maura G, Billionnet C, Drouin J, Weill A, Neumann A, Pariente A. Oral  
501 anticoagulation therapy use in patients with atrial fibrillation after the introduction of  
502 non-vitamin K antagonist oral anticoagulants: findings from the French healthcare  
503 databases, 2011–2016. *BMJ Open.* 2019;9:e026645. doi:10.1136/bmjopen-2018-026645
- 504 26. Koretsune Y, Yamashita T, Akao M, Atarashi H, Ikeda T, Okumura K, Shimizu W,  
505 Tsutsui H, Toyoda K, Hirayama A, et al. Baseline demographics and clinical  
506 characteristics in the All Nippon AF in the Elderly (ANAFIE) Registry. *Circ J*  
507 2019;83:1538–1545. doi: 10.1253/circj.CJ-19-0094
- 508 27. Beller JP, Krebs ED, Hawkins RB, Mehaffey JH, Quader MA, Speir AM, Kiser AC,  
509 Joseph M, Yarboro LT, Teman NR, et al. Non-vitamin K oral anticoagulant use after  
510 cardiac surgery is rapidly increasing. *J Thorac Cardiovasc Surg.* 2020;160:1222–1231.  
511 doi: 10.1016/j.jtcvs.2019.09.064
- 512 28. ElBardissi AW, DiBardino DJ, Chen FY, Yamashita MH, Cohn LH. Is early  
513 antithrombotic therapy necessary in patients with bioprosthetic aortic valves in normal  
514 sinus rhythm? *J Thorac Cardiovasc Surg.* 2010;139:1137–1145. doi:

515 10.1016/j.jtcvs.2009.10.064

516 29. Bravata DM, Coffing JM, Kansagara D, Myers J, Murphy L, Homoya BJ, Perkins

517 AJ, Snow K, Quin JA, Zhang Y, et al. Association between antithrombotic medication

518 use after bioprosthetic aortic valve replacement and outcomes in the Veterans Health

519 Administration System. *JAMA Surg.* 2019;145:e184679. doi:

520 10.1001/jamasurg.2018.4679

521

522 **Figure legends**

523

524 **Figure 1.** Enrollment, randomization, and follow-up of the patients

525 **Figure 2.** Primary and secondary endpoints

526 **Figure 3.** Kaplan–Meier analysis of the primary and key secondary endpoints

527 A: Primary endpoint. B: Intracardiac thrombus. C: Major bleeding. D: Net outcome  
528 (composite of stroke, systemic embolism, or major bleeding).

529 **Figure 4.** Results of the subgroup analysis of the primary endpoint

530 Ccr, creatinine clearance.

531

**Table 1: Demographic and Clinical Characteristics of the Patients**

| <b>Characteristic</b>                        | <b>All Patients<br/>(N=389)</b> | <b>Edoxaban<br/>(N=195)</b> | <b>Warfarin<br/>(N=194)</b> |
|----------------------------------------------|---------------------------------|-----------------------------|-----------------------------|
| Age,                                         |                                 |                             |                             |
| Mean± SD, yr                                 | 72.7 ± 6.1                      | 72.9 ± 6.3                  | 72.5 ± 5.8                  |
| Distribution                                 |                                 |                             |                             |
| <65yr                                        | 33 (8.5)                        | 16 (8.2)                    | 17 (8.8)                    |
| ≥65 yr and <75 yr                            | 204 (52.4)                      | 93 (47.7)                   | 111 (57.2)                  |
| ≥75 yr and <80 yr                            | 90 (28.3)                       | 69 (35.4)                   | 41 (21.1)                   |
| ≥80 yr                                       | 42 (10.8)                       | 17 (8.7)                    | 25 (12.9)                   |
| Male sex-no. (%)                             | 221 (56.8)                      | 100 (51.3)                  | 121 (62.4)                  |
| Weight                                       |                                 |                             |                             |
| Mean± SD, kg                                 | 60.6 ± 11.4                     | 59.0 ± 10.6                 | 62.3 ± 12.0                 |
| Distribution                                 |                                 |                             |                             |
| ≤60kg                                        | 194 (49.9)                      | 110 (56.4)                  | 84 (43.3)                   |
| >60Kg                                        | 195 (50.1)                      | 85 (43.6)                   | 110 (56.7)                  |
| Creatinine clearance                         |                                 |                             |                             |
| Mean± SD, ml/min                             | 63.7 ± 1.5                      | 63.3 ± 1.5                  | 64.0 ± 1.5                  |
| Distribution                                 |                                 |                             |                             |
| >50ml/min                                    | 293 (75.3)                      | 150 (76.9)                  | 143 (73.7)                  |
| ≤50ml/min                                    | 96 (24.7)                       | 45 (23.1)                   | 51 (26.3)                   |
| CHADS <sub>2</sub> Score                     | 2.0 ± 1.2                       | 2.1 ± 1.2                   | 2.0 ± 1.1                   |
| CHA <sub>2</sub> DS <sub>2</sub> -VASc Score | 3.4 ± 1.4                       | 3.5 ± 1.4                   | 3.4 ± 1.4                   |
| HAS-BLED Score                               | 1.1 ± 0.6                       | 1.1 ± 0.6                   | 1.1 ± 0.6                   |



|                                   |            |            |            |
|-----------------------------------|------------|------------|------------|
| Atrial Fibrillation, no (%)       | 80 (20.6)  | 42 (21.5)  | 38 (19.6)  |
| Antiplatelet drug, no (%)         | 67 (17.2)  | 33 (16.9)  | 34 (17.5)  |
| New York Heart Association class  |            |            |            |
| Class III or IV, no (%)           | 26 (6.7)   | 13 (6.7)   | 13 (6.7)   |
| Prosthetic valve position, no (%) |            |            |            |
| Aortic only                       | 339 (87.1) | 168 (86.2) | 171 (88.1) |
| Mitral only                       | 37 (9.5)   | 20 (10.3)  | 17 (8.8)   |
| Both                              | 13 (3.3)   | 7 (3.6)    | 6 (3.1)    |
| Initial dose of edoxaban          |            |            |            |
| Distribution, no (%)              |            |            |            |
| 60mg                              |            | 64 (32.8)  |            |
| 30mg                              |            | 131 (67.2) |            |

---

SD, standard deviation

430 Patients aged 18 to 85 years undergoing bioprosthetic valve replacement at the aortic and/or mitral position gave consent and were assessed for eligibility

20 were excluded  
15 Did not meet eligibility criteria  
5 Withdrew consent

410 Underwent randomization

205 Were assigned to receive edoxaban

205 Were assigned to receive warfarin

10 Withdrew before receipt of edoxaban

11 Withdrew before receipt of warfarin

195 Were included in the analysis

194 Were included in the analysis

20 Discontinued trial

17 Discontinued trial

175 Completed the trial

177 Completed the trial

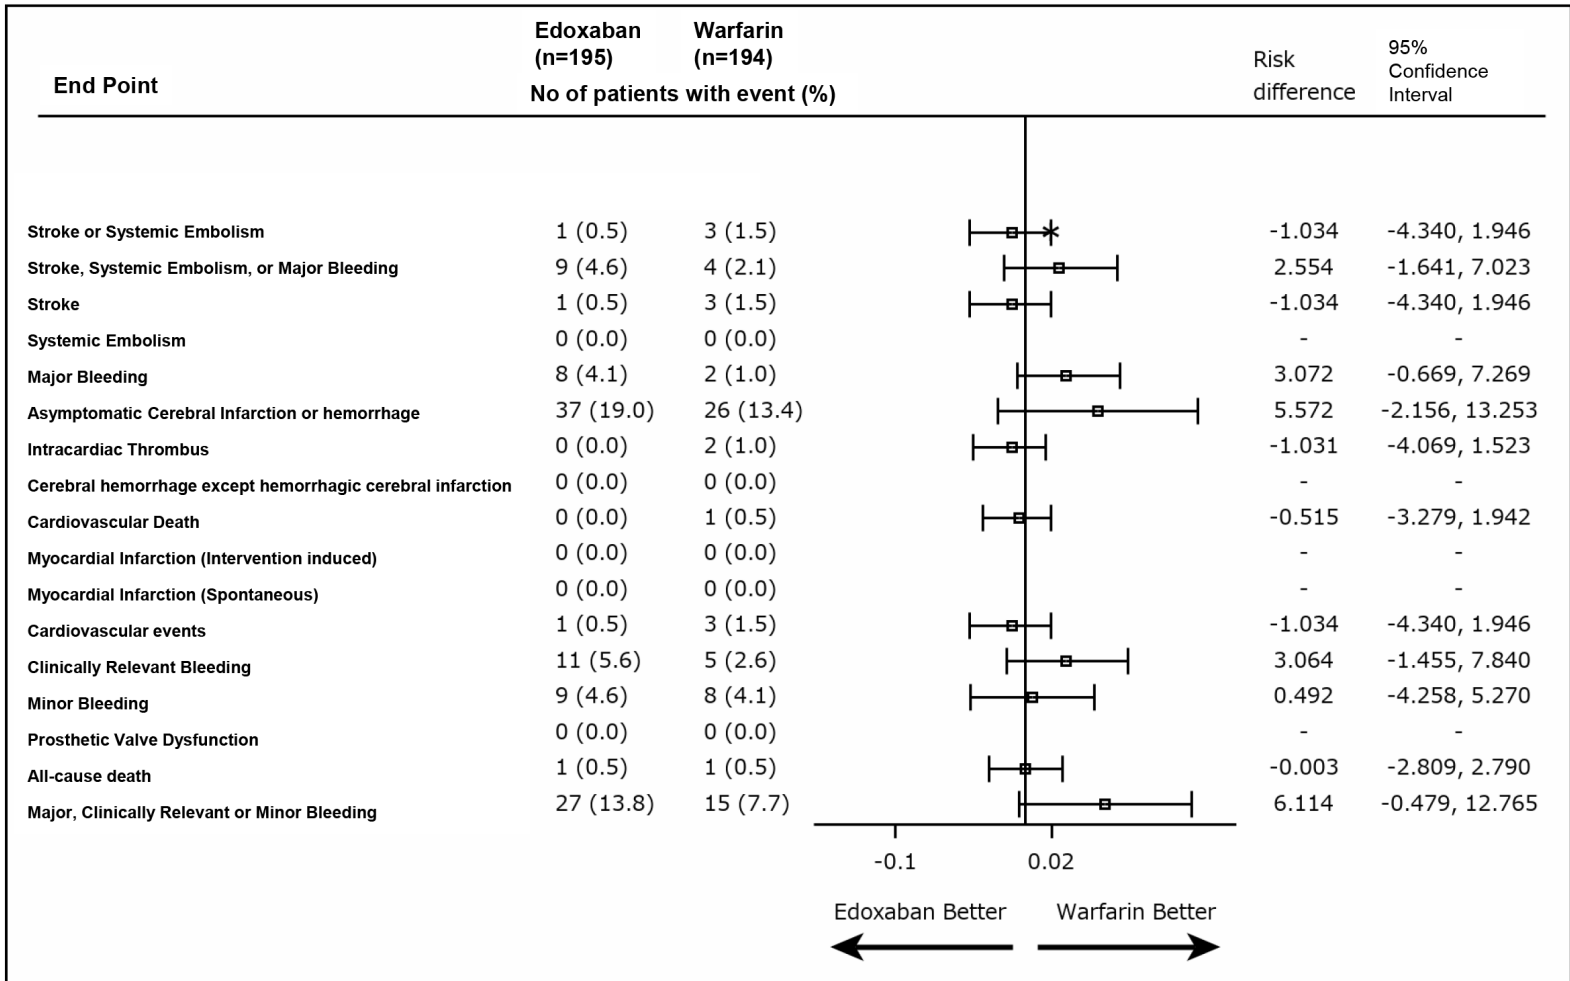

A

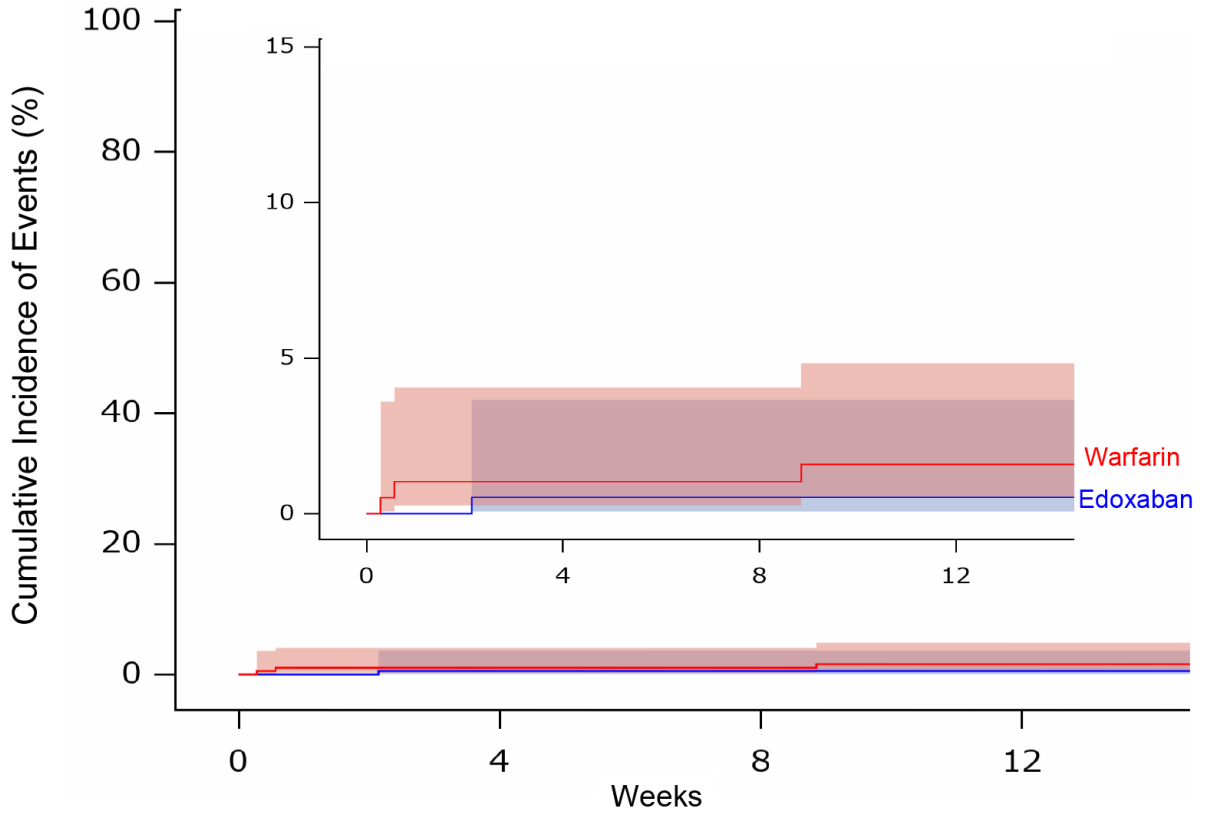

**No. at Risk**

Edoxaban

195

188

181

178

Warfarin

194

182

181

177

B

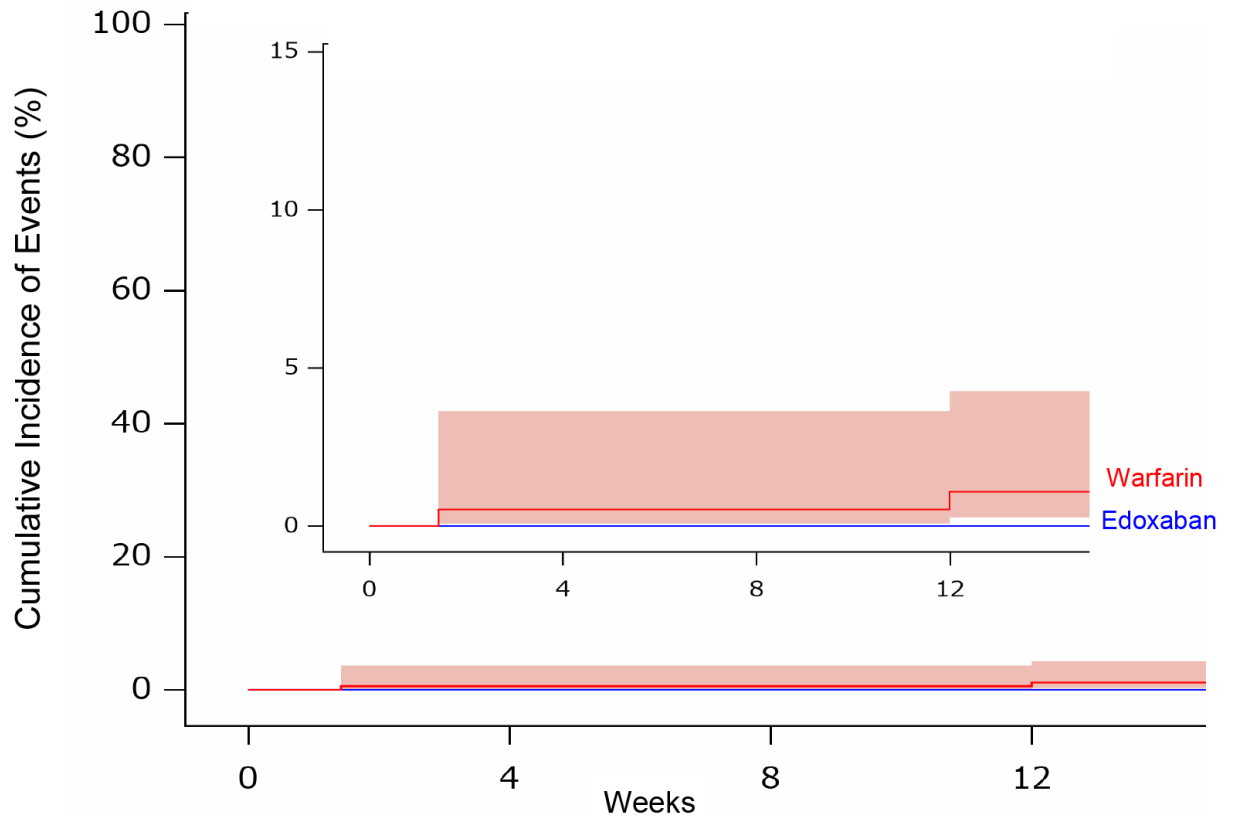

**No. at Risk**

Edoxaban

195

188

181

178

Warfarin

194

183

181

177

C

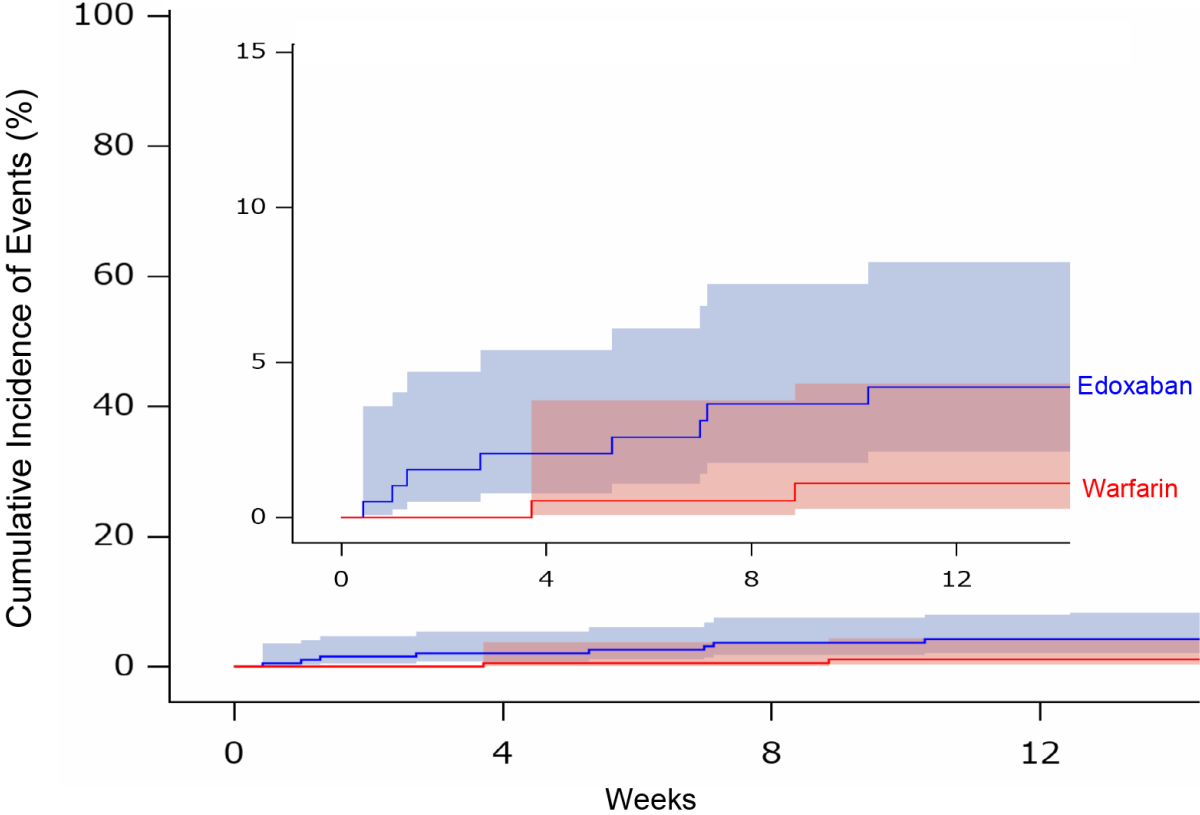

**No. at Risk**

|          |     |     |     |     |
|----------|-----|-----|-----|-----|
| Edoxaban | 195 | 187 | 179 | 176 |
| Warfarin | 194 | 183 | 181 | 177 |

D

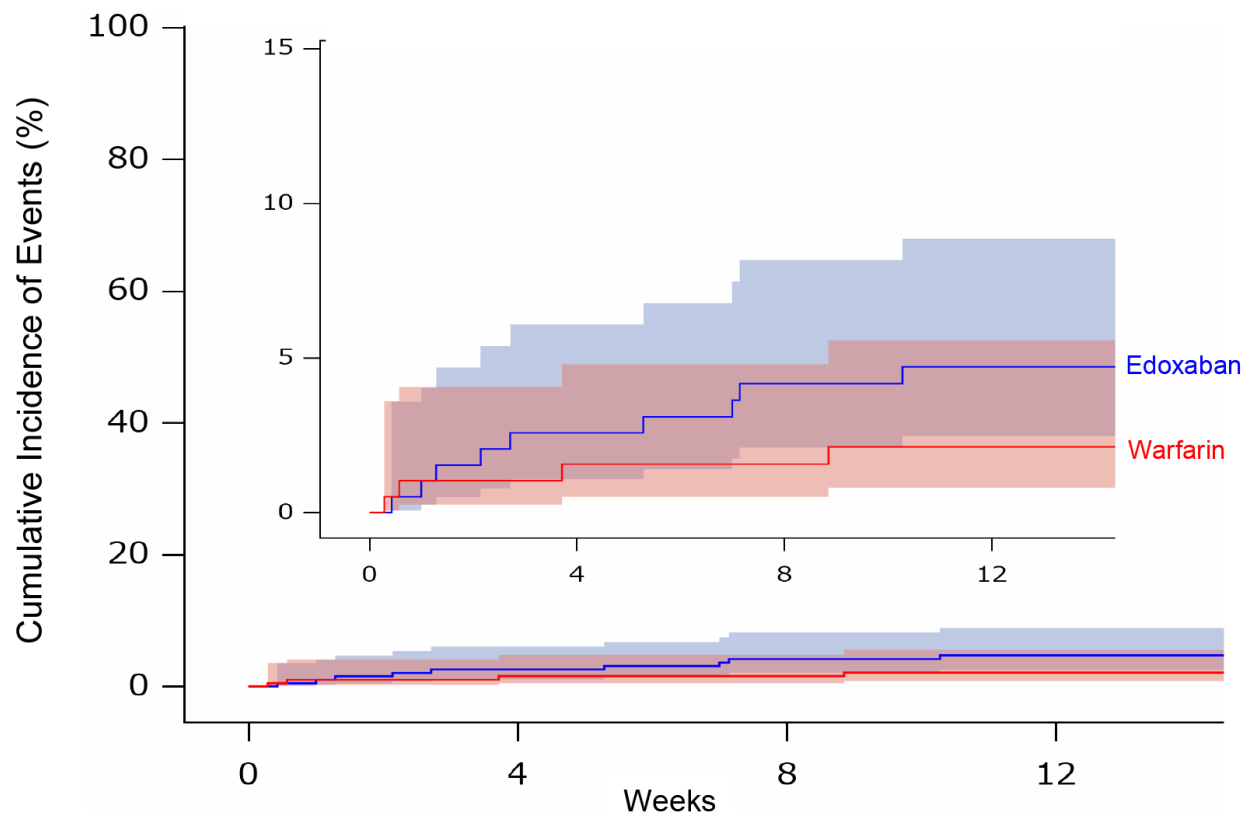

| No. at Risk |     |
|-------------|-----|
| Edoxaban    | 195 |
| Warfarin    | 194 |
|             | 187 |
|             | 181 |
|             | 179 |
|             | 180 |
|             | 176 |
|             | 176 |

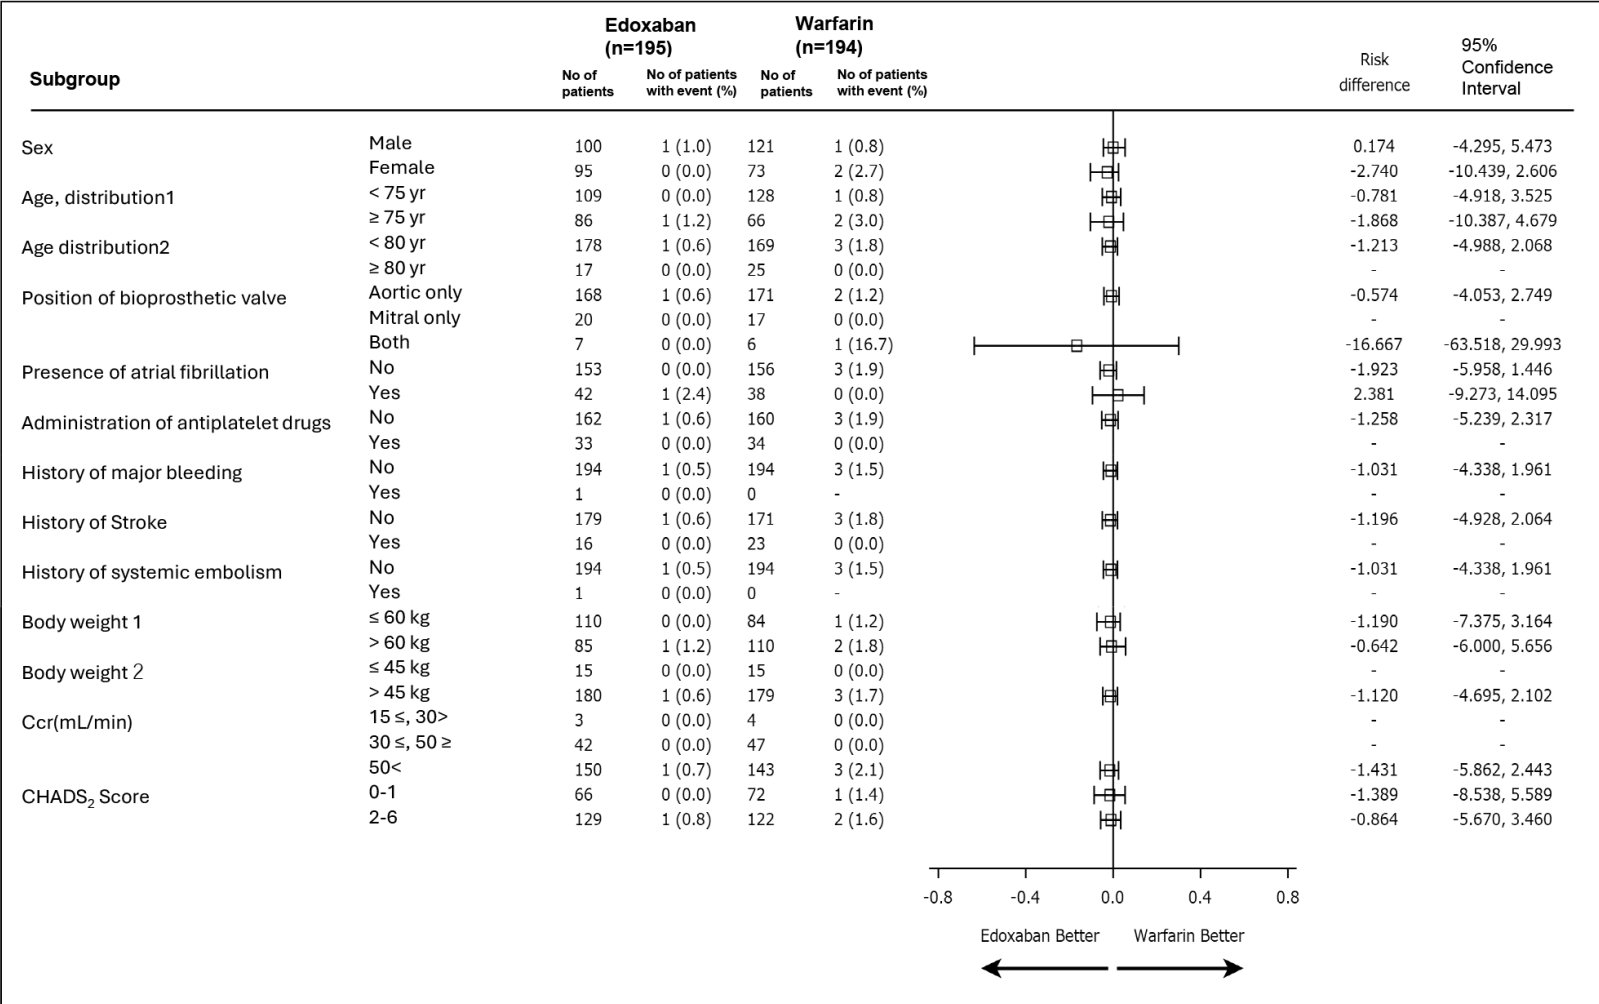

Source: https://medrxiv.org/content/10.1101/2024.10.16.24315630v1.full.pdf
